# Supplementary material for: Precursor engineering towards orange- and red-emissive carbon dots for LEDs with tunable emission colors
Source: Royal Society of Chemistry journal article supplement (doi:10.1039/d4nr03184a), 2024-11-22
Supplement: d4nr03184a1.pdf [file d4nr03184a1.pdf]

## *Supplementary Information*

### **Precursor Engineering towards Orange and Red-Emissive Carbon Dots for LEDs with Tunable Emission Colors**

Jiixin Sun,<sup>a,b</sup> Wenjie Xu,<sup>b</sup> Yixiang Liu,<sup>b</sup> Bin Sun,<sup>b</sup> Jie Xiong,<sup>b</sup> Yongfu Lian,<sup>\*a</sup> Yanhui  
Lou,<sup>\*b</sup> and Lai Feng<sup>\*b</sup>

<sup>a</sup>Key Laboratory of Functional Inorganic Material Chemistry, Ministry of Education,  
School of Chemistry and Materials Science, Heilongjiang University, Harbin 150080,  
China. Email::chyflian@hlju.edu.cn

<sup>b</sup>School of Energy, Soochow Institute for Energy and Materials InnovationS,  
Soochow University, Suzhou 215006, China. Email: fenglai@suda.edu.cn,  
yhlou@suda.edu.cn

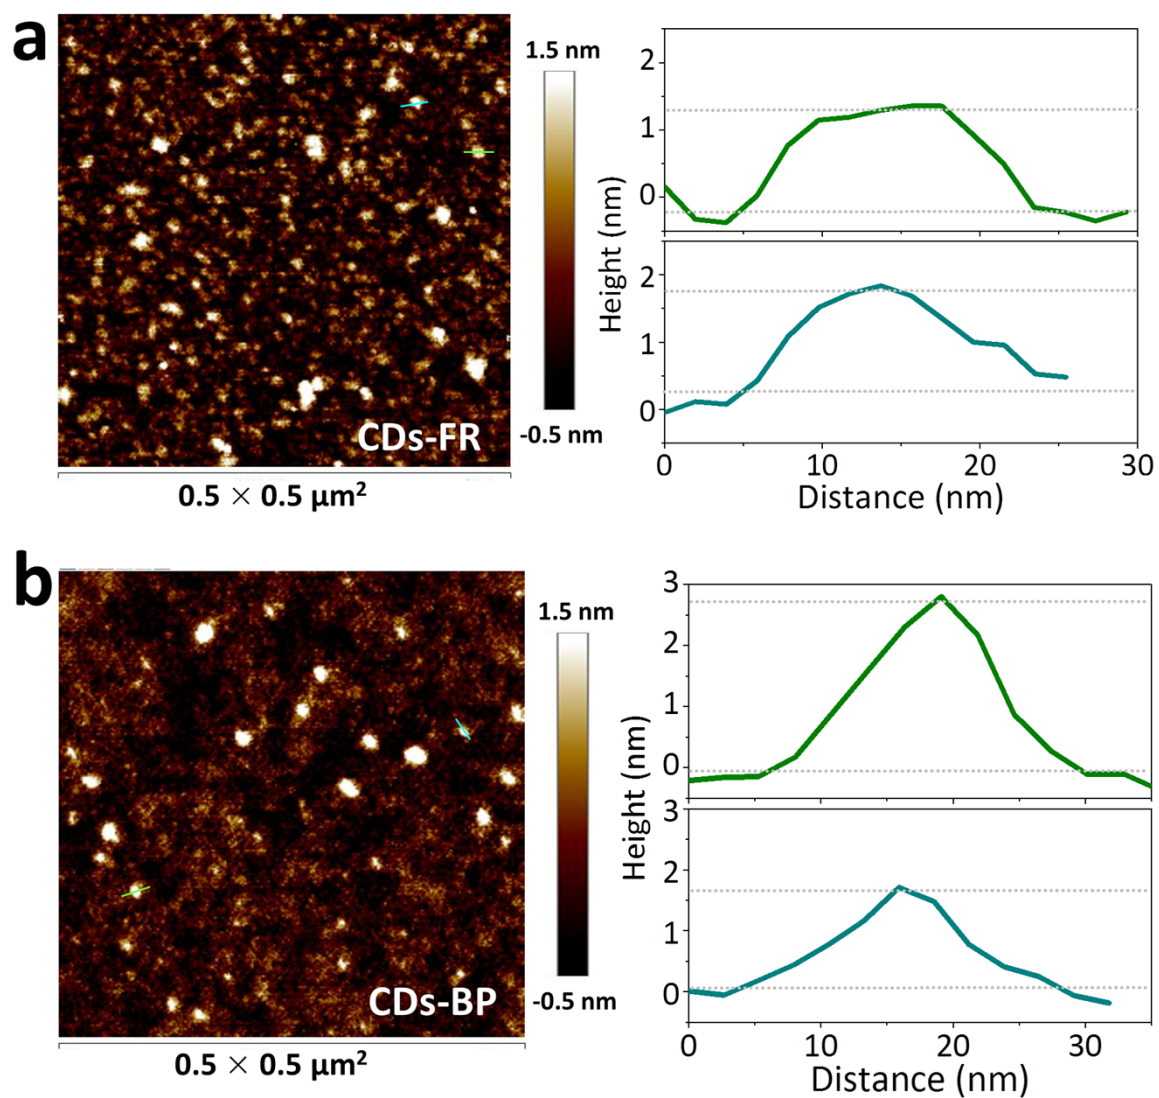

**Figure S1.** AFM images of (a) CDs-FR and (b) CDs-BP, and corresponding height profiles.

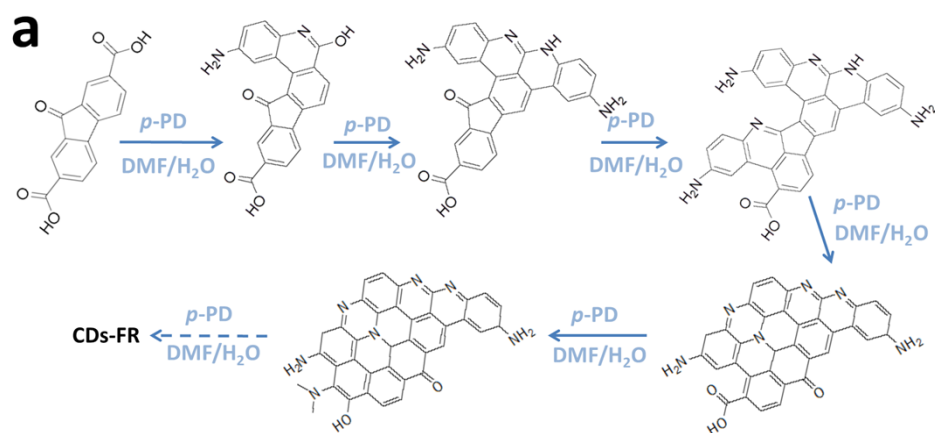

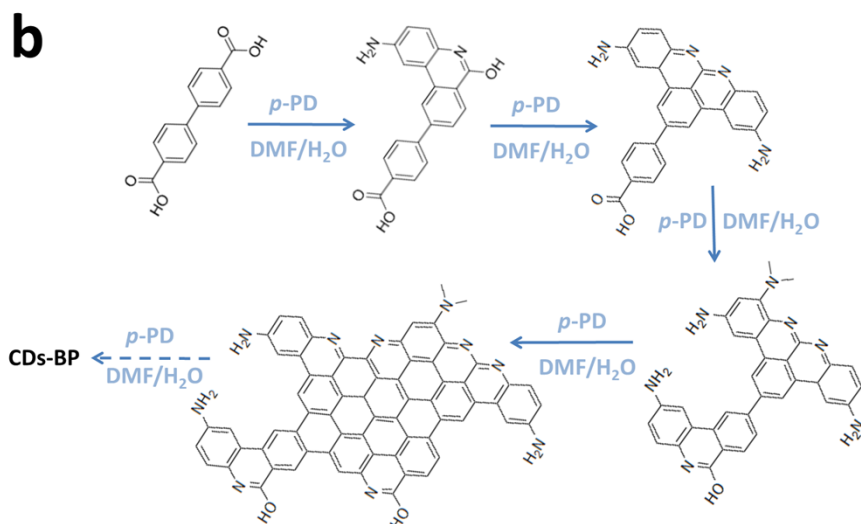

**Figure S2.** Formation mechanisms of (a) CDs-FR and (b) CDs-BP.

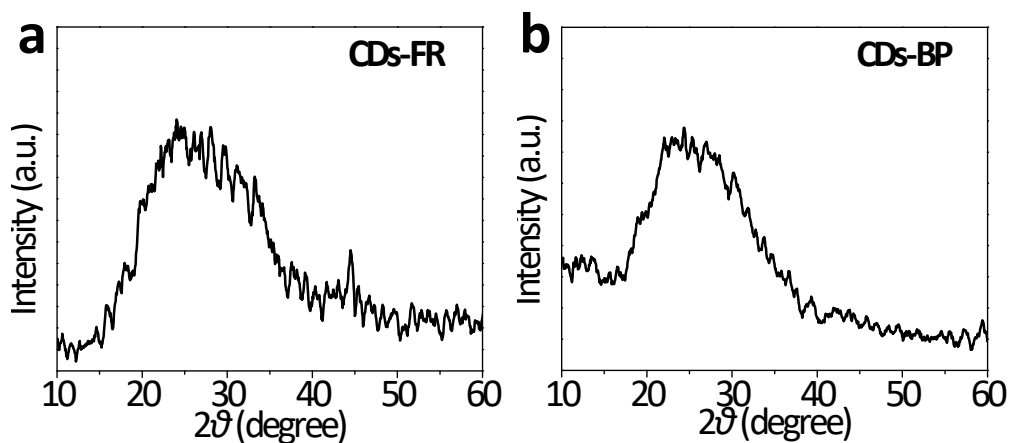

**Figure S3.** XRD patterns of (a) CDs-FR and (b) CDs-BP.

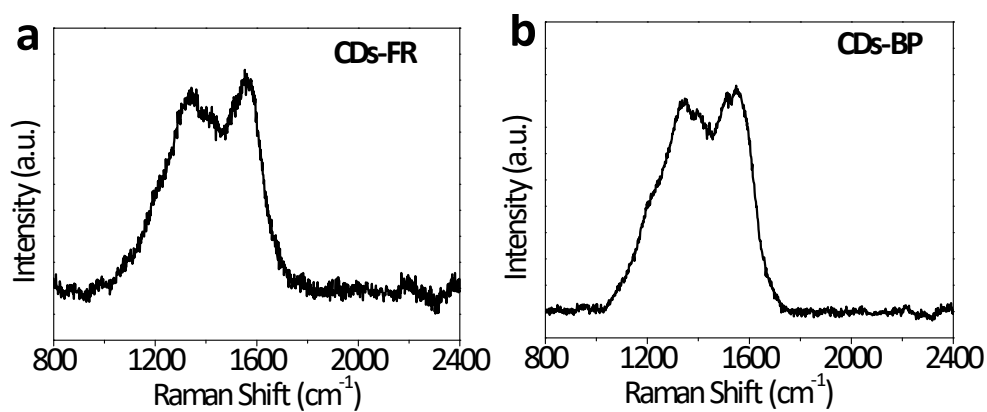

**Figure S4.** Raman spectra of (a) CDs-FR and (b) CDs-BP.

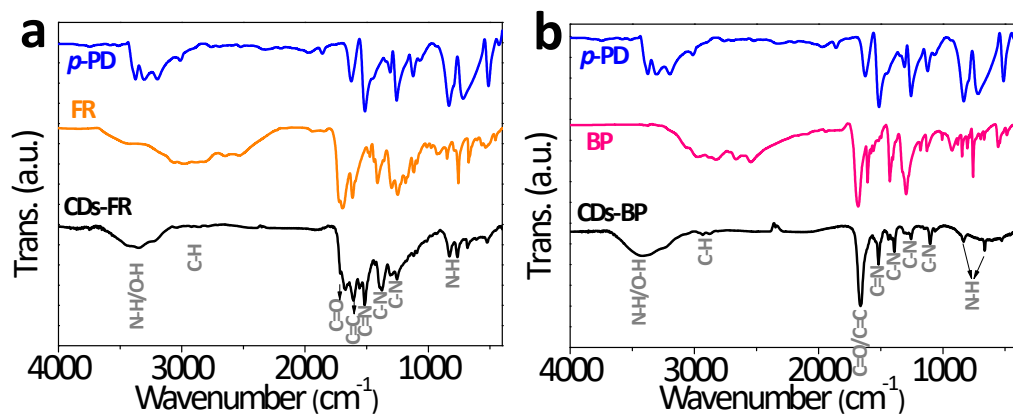

**Figure S5.** FT-IR spectra of CDs-FR, CDs-BP and precursors (FR, BP and *p*-PD).

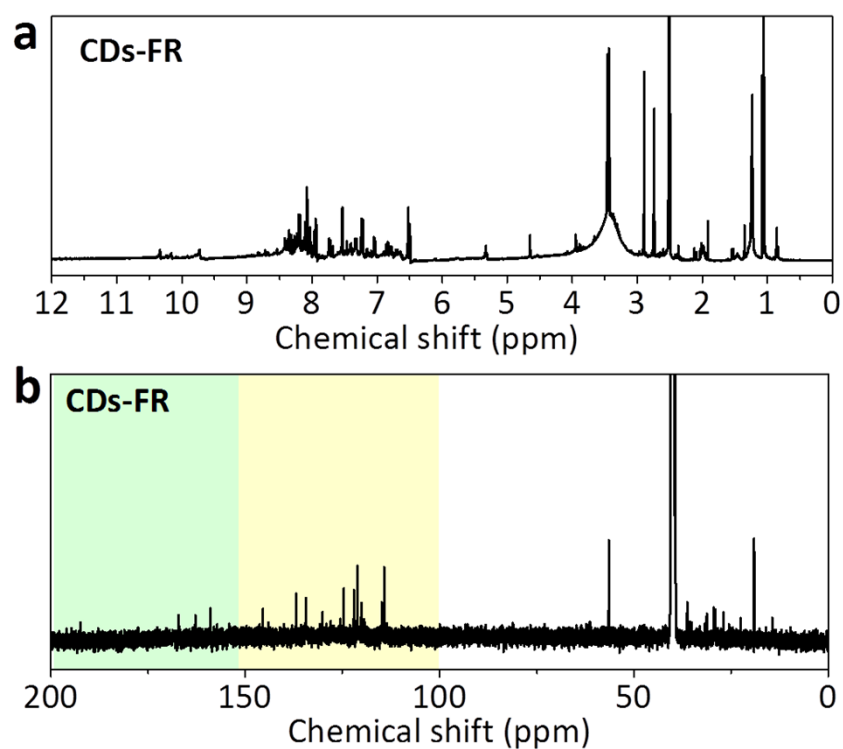

**Figure S6.** (a) <sup>1</sup>H and (b) <sup>13</sup>C NMR spectra (400/100 MHz with DMSO-d<sub>6</sub>) of CDs-FR.

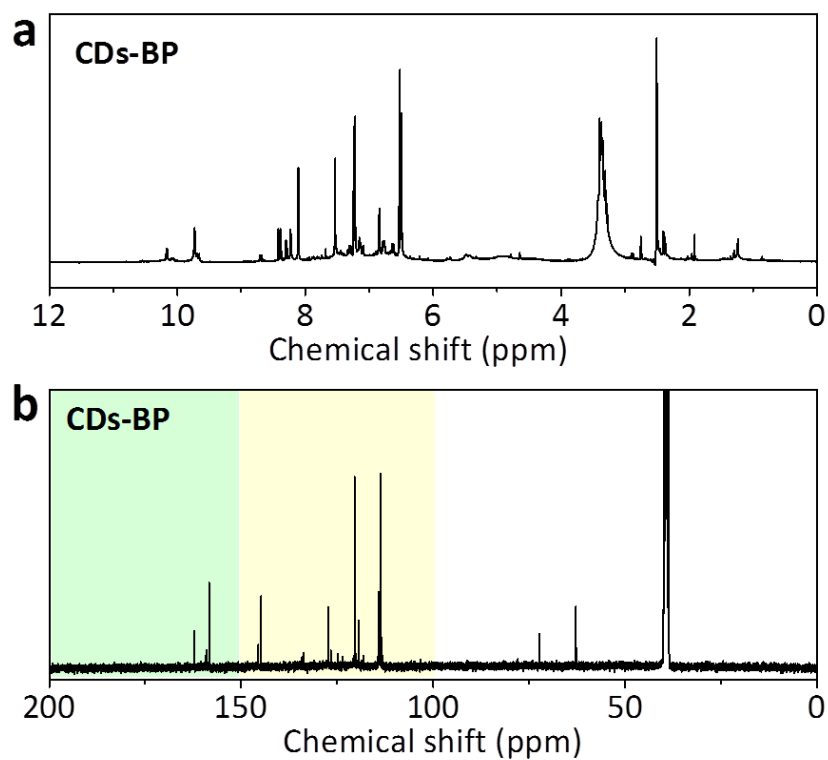

**Figure S7.** (a)  $^1\text{H}$  and (b)  $^{13}\text{C}$  NMR spectra (400/100 MHz with  $\text{DMSO-d}_6$ ) of CDs-BP.

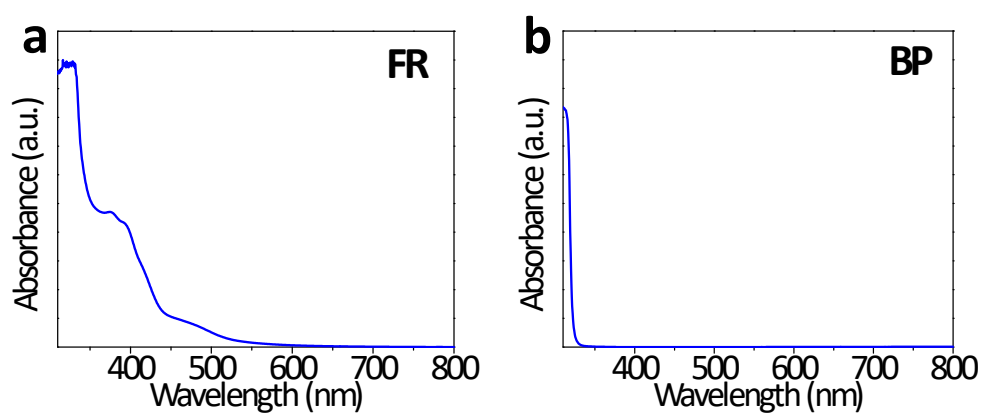

**Figure S8.** UV-Vis absorption spectra of precursors (a) FR and (b) BP (each  $0.2 \text{ mg mL}^{-1}$  in acetone).

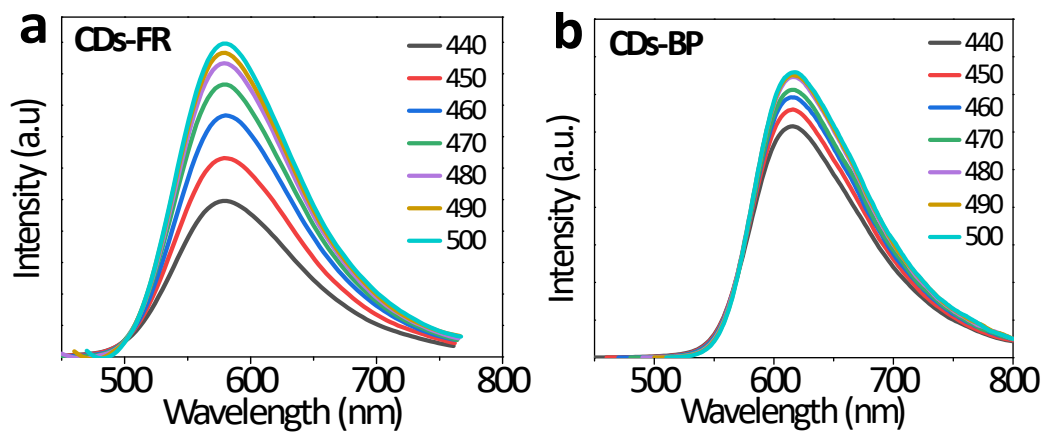

**Figure S9.** PL emission spectra of (a) CDs-FR and (b) CDs-BP in acetone solution with various excitation wavelengths.

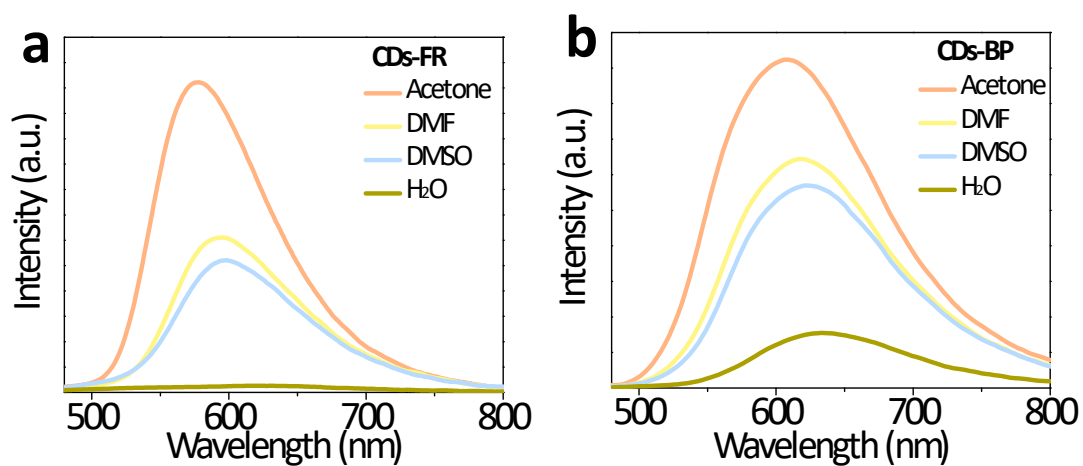

**Figure S10.** PL emission spectra of (a) CDs-FR and (b) CDs-BP in various solvents (i.e., acetone, DMF, DMSO and H<sub>2</sub>O with increasing polarity;  $\lambda_{ex}$ =470 nm).

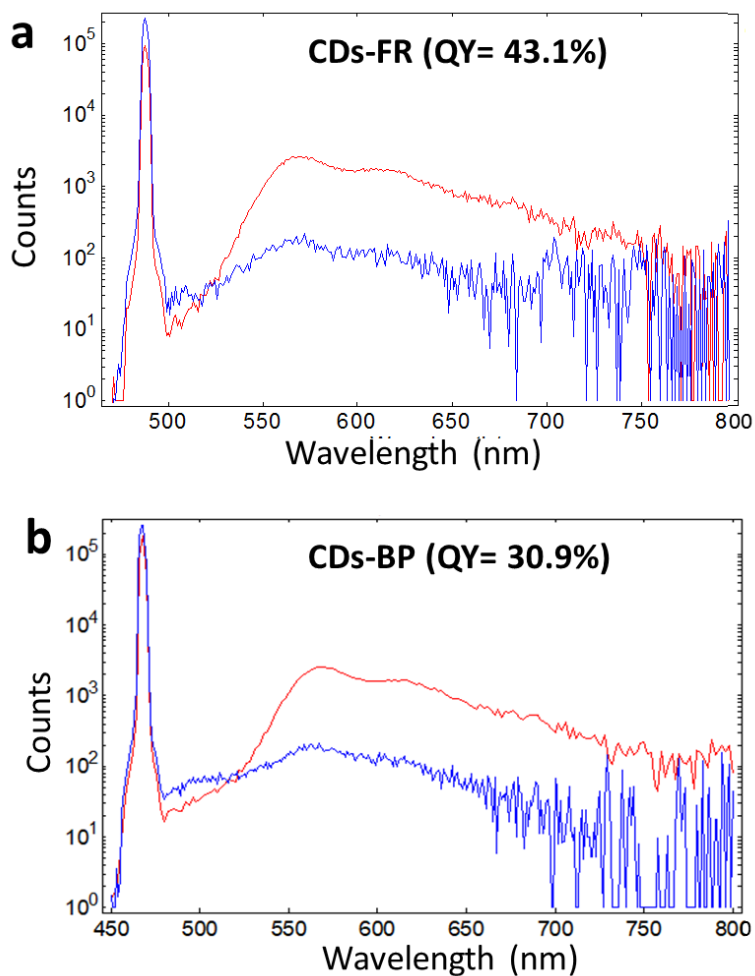

**Figure S11.** PL quantum yields of (a) CDs-FR and (b) CDs-BP with the same concentrations in acetone solution.

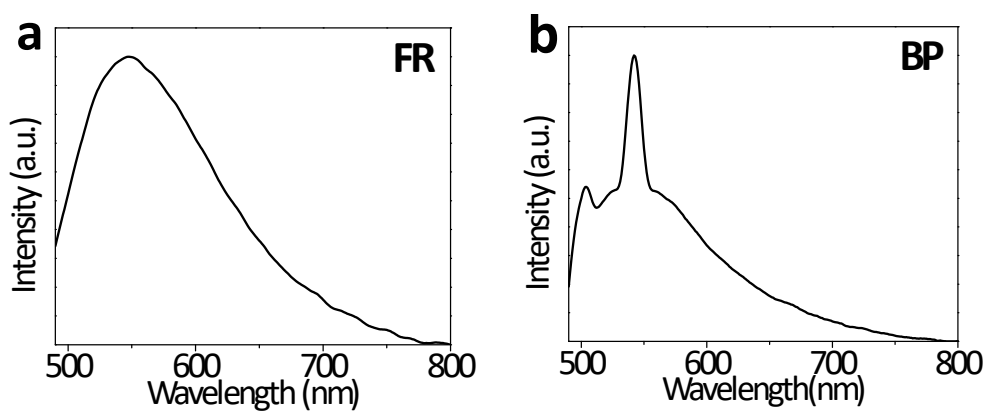

**Figure S12.** PL spectra of precursors (a) FR and (b) BP (each  $0.2 \text{ mg mL}^{-1}$  in acetone).

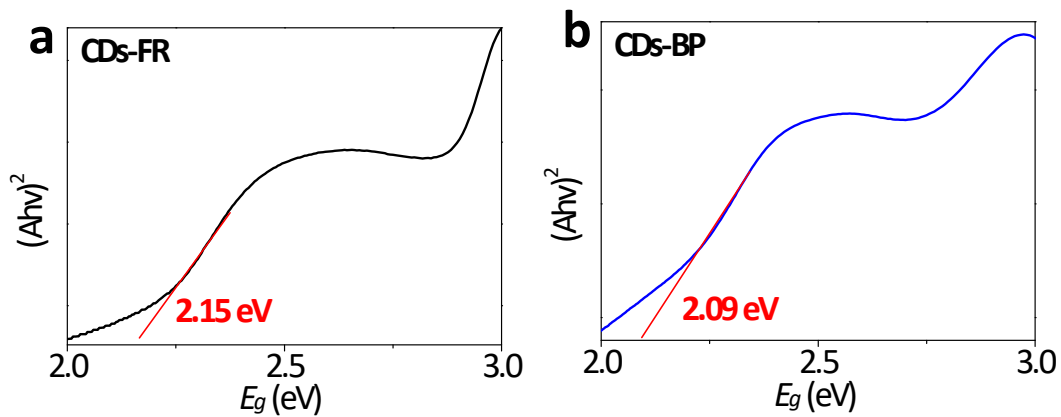

**Figure S13.** Tauc plots of (a) CDs-FR and (b) CDs-BP.

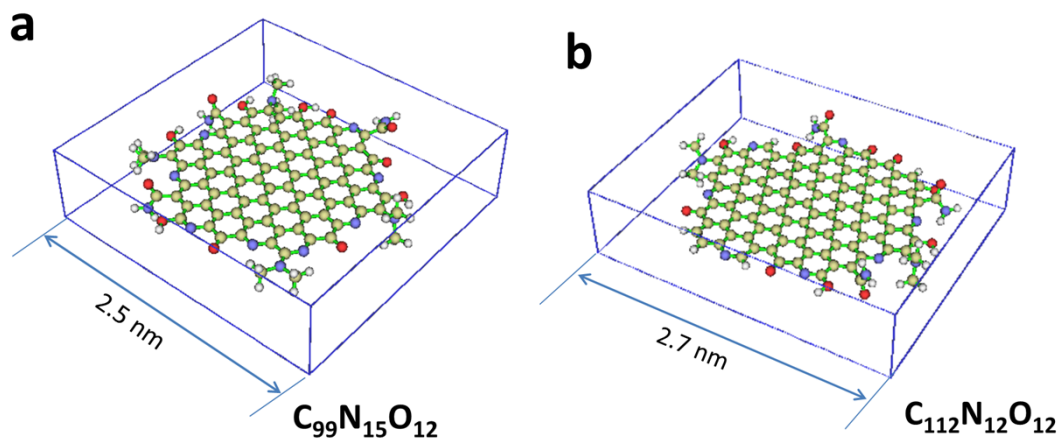

**Figure S14.** Size measurements of (a)  $C_{99}N_{15}O_{12}$  and (b)  $C_{112}N_{12}O_{12}$  models.

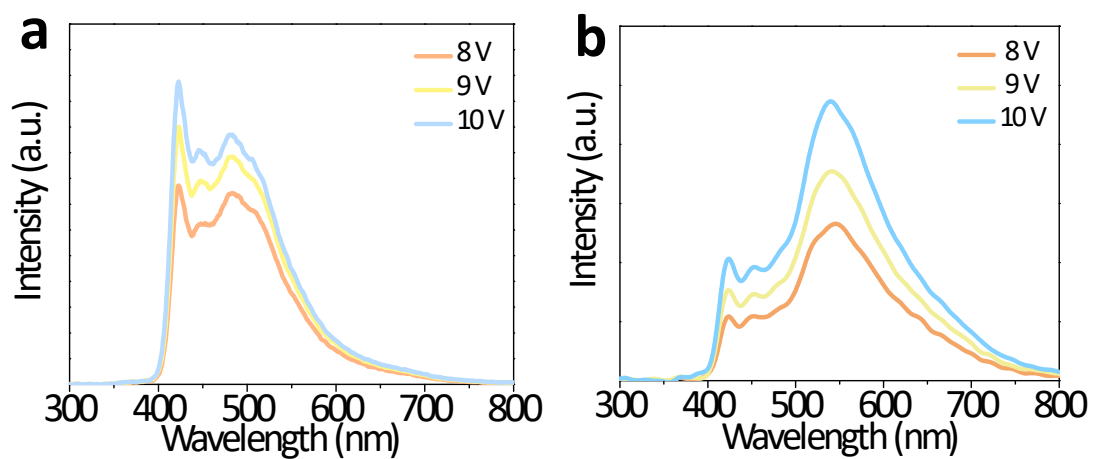

**Figure S15.** EL emission spectra of the LED devices with (a) CDs-FR and (b) CDs-BP at various voltages.



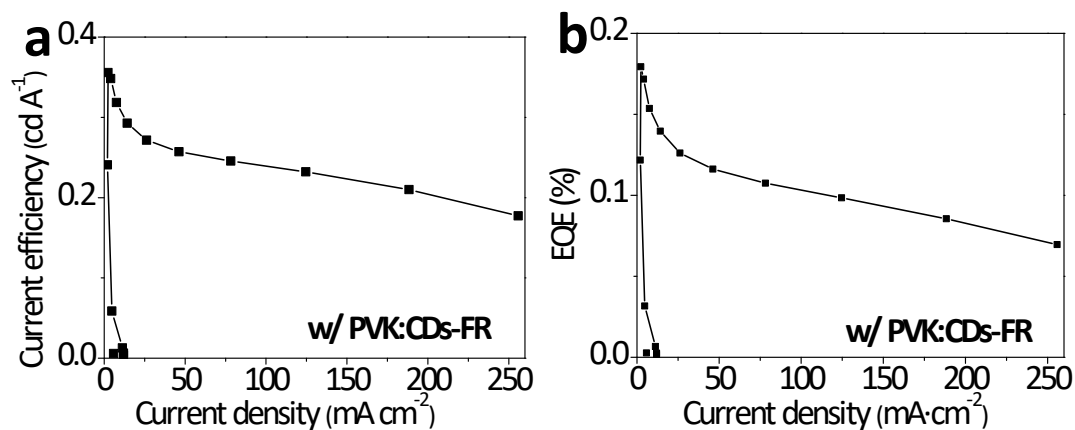

**Figure S16.** (a) Current efficiency and (b) EQE profiles measured for the LED device based on PVK:CDs-FR film.

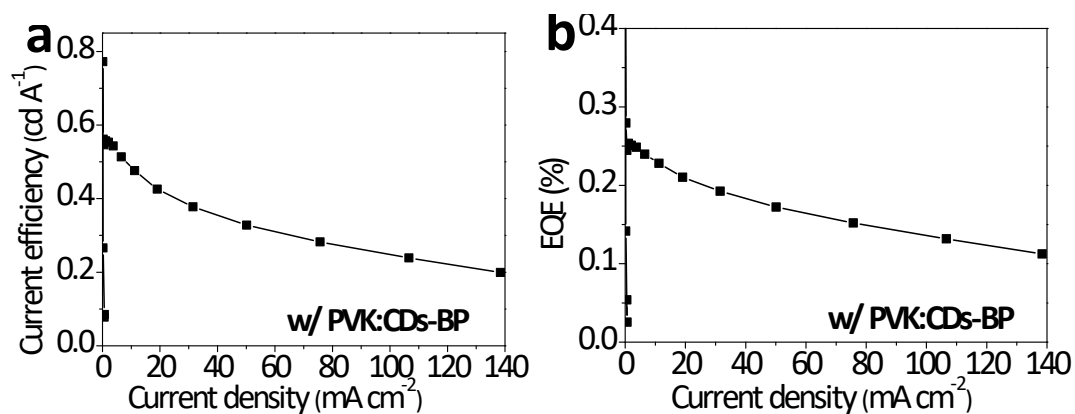

**Figure S17.** (a) Current efficiency and (b) EQE profiles measured for the LED device based on PVK:CDs-BP film.

**Table S1.** Bi-exponential fitting results<sup>b</sup> for transient PL of CQDs-FR and CQDs-BP in acetone solution.

| CDs <sup>a</sup> | $\tau_1$ (ns) | $A_1$ (%) | $\tau_2$ (ns) | $A_2$ (%) | $\tau_{avg}$ (ns) |
|------------------|---------------|-----------|---------------|-----------|-------------------|
| CDs-FR           | 3.91          | 57.25     | 7.70          | 42.75     | 6.17              |
| CDs-BP           | 2.03          | 88.65     | 3.35          | 11.35     | 2.32              |

<sup>a</sup> $\tau_{avg}$  is calculated using the equation 
$$\tau_{avg} = \frac{\sum A_i \tau_i^2}{\sum A_i \tau_i}$$

**Table S2.** Summary of the electroluminescence (EL) performances of recently reported CDs-LEDs with cyan/yellow or near cyan/yellow light.

| LEDs        | $V_{on}$ (V) | $L_{max}$ ( $cd/m^2$ ) | $\eta_{max}$ (cd/A) | color        | CIE         | PLQY(%) | Ref. |
|-------------|--------------|------------------------|---------------------|--------------|-------------|---------|------|
| CDs-LED     | 9.9          | 220                    | /                   | yellow-green | 0.30,0.65   | 16.7    | [1]  |
| CDOFs       | 3.3          | 1818                   | 4.4                 | yellow       | 0.64,0.30   | 42.3    | [2]  |
| Y-LEDs      | 2.6          | $\sim 10^3$            | 15.78               | yellow       | 0.44,0.53   | 12.16   | [3]  |
| G-LED       | 5.6          | 227                    | 0.47                | green        | 0.33,0.56   | 54.6    | [4]  |
| C-LED       | $\sim 6.0$   | $\sim 800$             | 4.18                | cyan         | 0.18,0.21   | 13.14   | [5]  |
| G-LED       | 3.7          | 2023                   | 5.51                | green        | 0.27,0.43   | 11.73   |      |
| RT-CDs-LEDs | 3.3          | 2967                   | 1.38                | yellow       | 0.57,0.42   | 80.56   | [6]  |
| PVK:CDs     | /            | 681                    | 0.54                | green        | 0.35,0.53   | 16.2    | [7]  |
| G-LEDs      | 3.7          | 4762                   | 5.11                | green        | /           | 72      | [8]  |
| Y-LEDs      | 3.5          | 2784                   | 2.31                | yellow       | /           | 62      |      |
| CD-LEDs     | 5            | 61                     | 0.018               | cyan         | 0.21,0.16   | 40      | [9]  |
| O-LED       | 3.1          | 9450                   | 1.57                | orange       | 0.36,0.52   | 25      | [10] |
| G-LED       | 3.6          | 4236                   | 2.34                | green        | 0.57,0.42   | 20      |      |
| WLED        | /            | /                      | /                   | white        | 0.33,0.35   | 97.2    | [11] |
| B           | 4.7          | 136                    | 0.084               | blue         | 0.19,0.20   | 75      | [12] |
| G           | 4.5          | 93                     | 0.045               | green        | 0.31,0.47   | 73      |      |
| Y           | 4.2          | 60                     | 0.02                | yellow       | 0.37,0.52   | 58      |      |
| O           | 3.9          | 65                     | 0.027               | orange       | 0.46,0.48   | 53      |      |
| R           | 3.7          | 12                     | 0.0028              | red          | 0.55,0.41   | 12      |      |
| CD-LEDs.    | $\sim 4.0$   | 579                    | /                   | red          | 0.692,0.307 | 52.35   | [13] |

|                |     |     |      |        |           |      |              |
|----------------|-----|-----|------|--------|-----------|------|--------------|
| PVK:CDs-<br>FR | 4.0 | 454 | 0.35 | cyan   | 0.25,0.29 | 43.1 | This<br>work |
| PVK:CDs-<br>BP | 4.5 | 276 | 0.56 | yellow | 0.44,0.51 | 30.9 |              |

#### References

- [1] Y. Ding, X. Li, Z. Zheng, M. Chen, Y. Zhang, Z. Liu, L. Guan, *J. Lumines.* 2022, **249**, 119036.
- [2] Y. Shi, Z. Wang, T. Meng, T. Yuan, R. Ni, Y. Li, X. Li, Y. Zhang, Z. a. Tan, S. Lei, L. Fan, *J. Am. Chem. Soc.* 2021, **143**, 18941.
- [3] B. Wang, H. Wang, Y. Hu, G. I. Waterhouse, S. Lu, *Nano Letters.* 2024, **24**, 2904-2911.
- [4] K. Xu, M. Zheng, H. Ma, B. Zhao, H. Jia, C. Zhang, Z. A. Tan, *Chem. Eng. J.* 2023, **470**, 144112.
- [5] B. Wang, H. Wang, Y. Hu, G. I. Waterhouse, S. Lu, *Nano Lett.* 2023, **23**, 8794-8800.
- [6] M. Zheng, H. Jia, B. Zhao, C. Zhang, Q. Dang, H. Ma, Z. A. Tan, *Small.* 2023, **19**, 2206715.
- [7] Z. Zheng, Z. Liu, Y. Ding, M. Chen, P. Lv, A. Tang, B. Liang, *J. Phy. Chem. Lett.* 2021, **12**, 12107-12113.
- [8] F. Yuan, T. Yuan, L. Sui, Z. Wang, Z. Xi, Y. Li, X. Li, L. Fan, Z. Tan, A. Chen, M. Jin, S. Yang, *Nat. Commun.* 2018, **9**, 2249.
- [9] X. Zhang, Y. Zhang, Y. Wang, S. Kalytchuk, S. V. Kershaw, Y. Wang, P. Wang, T. Zhang, Y. Zhao, H. Zhang, T. Cui, Y. Wang, J. Zhao, W.W. Yu, A.L. Rogach, *ACS Nano* 2013, **7**, 11234–11241.
- [10] B. Zhao, H. Ma, H. Jia, M. Zheng, K. Xu, R. Yu, Z. A. Tan, *Angew. Chem. Int. Ed.* 2023, **135**, e202301651.
- [11] Y. Liu, B. Wang, Y. Zhang, J. Guo, X. Wu, D. Ouyang, S. Qu, *Adv. Funct. Mater.* 2024, 2401353.
- [12] F. Yuan, Z. Wang, X. Li, Y. Li, Z. Tan, L. Fan, S. Yang, *Adv. Mater.* 2017, **29**, 1604436.
- [13] R. Chen, Z. Wang, T. Pang, Q. Teng, C. Li, N. Jiang, F. Yuan, *Adv. Mater.* 2023, **35**, 2302275.
